# Supplementary material
Source: PubMed Central journal article supplement (PMC4474298)
Supplement: JVI.03287-14_zjv999090462so1.pdf [file JVI.03287-14_zjv999090462so1.pdf]

**A. GP2**

|      |                  |                    |                    |                    |                      |                   |                             |              |     |
|------|------------------|--------------------|--------------------|--------------------|----------------------|-------------------|-----------------------------|--------------|-----|
|      | 20               | 40                 | a. (15)            | 60                 | 80                   |                   |                             |              |     |
| KS62 | MKWGPCKASL       | TKLANFSWML         | SRNFWCPLLI         | SSYFWPFCCLA        | SPSLAGWSS ASDWFAPRYS | VRALPFTLSN        | YRRSYEAFLS                  | 80           |     |
| NVSL | .....L.....      | .....L.....        | .....L.....        | .....L.....        | .....L.....          | .....L.....       | .....L.....                 | 80           |     |
| KS06 | .....L.....      | .....L.....        | .....L.....        | .....L.....        | .....L.....          | .....L.....       | .....L.....                 | 80           |     |
| VR23 | .....FF.....     | .....L.....        | .....SS.....       | .....L.....        | .....PV.....         | .....F.....       | .....H.....                 | 80           |     |
| SDSU | .....F.....      | .....L.....        | .....SS.....       | .....L.....        | .....PV.....         | .....F.....       | .....H.....                 | 80           |     |
| P129 | .....LY.....S    | .....S.....L.....  | .....L.....S.....  | .....L.....S.....  | .....PV.....         | .....F.....       | .....H.....                 | 80           |     |
| LV   | .....QH.GV--     | .....S.SC.TP       | .....LSSLLVW       | .....LPFSL.Y.G     | .....QD.Y.F          | .....F.E.....     | .....P.....GL.P             | 77           |     |
|      | 100              | 120                | b. (15)            | 140                | 160                  |                   |                             |              |     |
| KS62 | LCQVDIPTWG       | TRHPLGMLWH         | HKVSTLIDEM         | VSRRMVRTME         | KAGQAAWKQV           | VSEATLSRIS        | GLDVVAHFQH                  | LAAIEAETCK   | 160 |
| NVSL | .....Q.....      | .....Q.....        | .....Q.....        | .....Q.....        | .....Q.....          | .....Q.....       | .....Q.....                 | 160          |     |
| KS06 | .....Q.R.....    | .....K.....F.....  | .....T.....I.....  | .....T.....I.....  | .....T.....I.....    | .....T.....I..... | .....T.....I.....           | 160          |     |
| VR23 | .....Q.....      | .....K.....        | .....I.....        | .....I.....        | .....I.....          | .....I.....       | .....I.....                 | 160          |     |
| SDSU | .....Q.....      | .....K.....        | .....I.....        | .....I.....        | .....I.....          | .....I.....       | .....I.....                 | 160          |     |
| P129 | .....Q.R.....    | .....VK.....F..... | .....I.....        | .....I.....        | .....I.....          | .....I.....       | .....I.....                 | 160          |     |
| LV   | .....N.RP.V.QFA  | .....VK.....F..... | .....MR.....H..... | .....I.....Q.....  | .....HS.....         | .....G.....TKL    | .....I.....T.....V.....DS.R | 157          |     |
|      | 180              | 200                |                    | 220                | 240                  |                   |                             |              |     |
| KS62 | YLASRLPMLH       | NLRMTGSNVT         | IVYNSTLNQV         | FAIFPTPGSR         | PKLHDFQQWL           | IAVHSSIFSS        | VAASCTLFVV                  | LWLRIPMLRT   | 240 |
| NVSL | .....S.....      | .....S.....        | .....S.....        | .....S.....        | .....S.....          | .....S.....       | .....S.....                 | .....S.....  | 240 |
| KS06 | .....S.....      | .....S.....        | .....S.....        | .....S.....        | .....S.....          | .....S.....       | .....S.....                 | .....S.....  | 240 |
| VR23 | .....S.....      | .....S.....        | .....S.....        | .....S.....        | .....S.....          | .....S.....       | .....S.....                 | .....S.....  | 240 |
| SDSU | .....S.....      | .....S.....        | .....S.....        | .....S.....        | .....S.....          | .....S.....       | .....S.....                 | .....S.....  | 240 |
| P129 | .....S.....      | .....S.....        | .....S.....        | .....S.....        | .....S.....          | .....S.....       | .....S.....                 | .....S.....  | 240 |
| LV   | .....F.S.....V.K | .....AV--G.S       | .....LQ.T.DR       | .....EL.....T..... | .....T.....R.....    | .....S.....A..... | .....S.....V.....I.....     | .....A.....Y | 235 |
| KS62 | VFGFRWLGA I      | FPSNSR * 257       |                    |                    |                      |                   |                             |              |     |
| NVSL | .....            | .....              |                    |                    |                      |                   |                             |              |     |
| KS06 | .....            | .....W. 257        |                    |                    |                      |                   |                             |              |     |
| VR23 | .....A.....      | .....L.....Q. 257  |                    |                    |                      |                   |                             |              |     |
| SDSU | .....            | .....S.....        |                    |                    |                      |                   |                             |              |     |
| P129 | .....            | .....L.....W. 257  |                    |                    |                      |                   |                             |              |     |
| LV   | .....H.PT.T      | .....H.S*-- 250    |                    |                    |                      |                   |                             |              |     |

**B. E (2a) protein**

|      |              |             |                   |                     |                    |                   |             |          |
|------|--------------|-------------|-------------------|---------------------|--------------------|-------------------|-------------|----------|
|      | 20           | 40          |                   | 60                  |                    |                   |             |          |
| KS62 | MGSMQSLFDK   | IGQLFVDAFT  | EFLVSIVDII        | I FLAILFGFT         | IAGWLVVFCI         | RLVCSAVLRT        | RPTIHPEQLQ  | KIL * 74 |
| NVSL | .....        | .....       | .....             | .....               | .....              | .....             | .....       | .....    |
| SDSU | .....        | .....       | .....             | .....               | .....              | .....             | .....       | .....    |
| P129 | .....I.....  | .....       | .....             | .....               | .....              | .....             | .....       | .....    |
| VR23 | .....Y.....  | .....       | .....T.....       | .....               | .....              | .....             | .....       | .....    |
| KS06 | .....A.....  | .....       | .....             | .....               | .....              | .....             | .....       | .....    |
| LV   | .....WS..... | .....S..... | .....V.....A..... | .....V.....L.....LL | .....V.....L.....S | .....SA.....SPE.S | .....V..... | 71       |

**C. GP3**

|      |                    |                 |                 |                |                |              |              |              |     |
|------|--------------------|-----------------|-----------------|----------------|----------------|--------------|--------------|--------------|-----|
|      | 20                 | 40              |                 | 60             | a. (15)        | 80           |              |              |     |
| KS62 | MANSCALLHI         | FLRCGFL-YS      | FCCAUVADSN      | ATYCFWFPLV     | RGNFSFELTV     | NYTVCPPCLT   | RRAAAEYEP    | GRSLWCRIGY   | 79  |
| NVSL | .....              | .....           | .....           | .....          | .....          | .....        | .....        | .....        |     |
| P129 | .....TF.....       | .....C.S.....   | .....G.....     | .....M.....    | .....M.....    | .....M.....  | .....M.....  | .....H.....  |     |
| VR23 | .....V.....TF..... | .....C.N.....   | .....G.....     | .....T.....    | .....T.....    | .....T.....  | .....T.....  | .....H.....  |     |
| SDSU | .....T.....        | .....L.C.S..... | .....A.....     | .....A.....    | .....A.....    | .....A.....  | .....A.....  | .....H.....  |     |
| KS06 | .....D.....        | .....P.....     | .....P.....     | .....M.....    | .....M.....    | .....M.....  | .....M.....  | .....H.....  |     |
| LV   | .....HQ.RF.F       | .....IC.L       | .....VHS.LASN.S | .....S.L.....A | .....H.T.....I | .....I.M.S   | .....SQ.RQRL | .....NM.K.H  |     |
|      | 100                | 120             |                 | 140            |                | 160          |              |              |     |
| KS62 | DRCSEEDHDD         | LGMFVPPG--      | -LSSEGLHTS      | VYAWLAFLSF     | SYTAQFHPEI     | FGIGNVSRVY   | VDIKHFICA    | VHDGKNATLP   | 156 |
| NVSL | .....D.....        | .....D.....     | .....S.....     | .....S.....    | .....S.....    | .....S.....  | .....S.....  | .....S.....  |     |
| P129 | .....G.D.....E     | .....E.....     | .....S.....     | .....S.....    | .....S.....    | .....S.....  | .....S.....  | .....S.....  |     |
| VR23 | .....E.D.....E     | .....E.....     | .....S.....     | .....S.....    | .....S.....    | .....S.....  | .....S.....  | .....S.....  |     |
| SDSU | .....G.D.....E     | .....E.....     | .....S.....     | .....S.....    | .....S.....    | .....S.....  | .....S.....  | .....S.....  |     |
| KS06 | .....G.....E       | .....E.....     | .....A.....     | .....A.....    | .....A.....    | .....A.....  | .....A.....  | .....A.....  |     |
| LV   | .....E.R.....E     | .....LMSI.S.YD  | .....N.KL.Y--   | .....A.....L   | .....A.....L   | .....A.....L | .....A.....L | .....A.....L |     |
|      | 180                | 200             |                 | 220            |                | 240          |              |              |     |
| KS62 | RHDNISAVYQ         | TYYLHQVDGG      | NWFHLEWLRP      | FFSSWLVLNV     | SWFLRRSPAS     | HVSQVFRS     | KPTQPQHQAAL  | LSSKTSAAALG  | 236 |
| NVSL | .....F.....        | .....Q.....     | .....Q.....     | .....Q.....    | .....Q.....    | .....Q.....  | .....Q.....  | .....Q.....  |     |
| P129 | .....F.....        | .....Q.....     | .....Q.....     | .....Q.....    | .....Q.....    | .....Q.....  | .....Q.....  | .....Q.....  |     |
| VR23 | .....F.....        | .....Q.....     | .....Q.....     | .....Q.....    | .....Q.....    | .....Q.....  | .....Q.....  | .....Q.....  |     |
| SDSU | .....F.....        | .....Q.....     | .....Q.....     | .....Q.....    | .....Q.....    | .....Q.....  | .....Q.....  | .....Q.....  |     |
| KS06 | .....H.....T.....  | .....Q.....     | .....Q.....     | .....Q.....    | .....Q.....    | .....Q.....  | .....Q.....  | .....Q.....  |     |
| LV   | .....TGH.....L.A   | .....A.H.I..... | .....L.....     | .....L.....    | .....L.....    | .....L.....  | .....L.....  | .....L.....  |     |
|      | 260                |                 |                 |                |                |              |              |              |     |
| KS62 | MA-----            | TRPLRR          | FAKALSAARR      | * 255          |                |              |              |              |     |
| NVSL | .....              | .....           | .....           | .....          |                |              |              |              |     |
| P129 | .....              | .....F.....     | .....N.....     | .....          |                |              |              |              |     |
| VR23 | .....I.....        | .....S.....     | .....V.....     | .....          |                |              |              |              |     |
| SDSU | .....I.....        | .....S.....     | .....V.....     | .....          |                |              |              |              |     |
| KS06 | .....              | .....           | .....VN.....    | .....          |                |              |              |              |     |
| LV   | .....LTGSQQRKRK    | .....FPSES..NVV | .....KPSV.PSTS  | .....          | 266            |              |              |              |     |

a. (14)

b. (13)

c. (12)

D. GP4

|      |            |            |            |            |
|------|------------|------------|------------|------------|
|      | 20         | 40         | 60         | 80         |
| KS62 | MVAPLLFLLV | GFKCFLVSQA | FACKPCFSSS | LSDIKTNTTA |
| NVSL | .A.        | .          | .          | .          |
| P129 | .A.S.      | .V.        | .          | .          |
| KS06 | .ATS.      | .EH.       | .          | T          |
| VR23 | .ASS.      | .V.        | .A.        | .AS.A.     |
| SDSU | .A.S.      | .M.        | .L.        | .A.        |
| LV   | .A.AT.F.A  | .AQHIM.E   | .TH        | .E.        |
|      | 100        | 120        | 140        | 160        |
| KS62 | VYITVTANVT | DENYLHSSDL | LMLSSCLFYA | SEMSEKGFKV |
| NVSL | .          | .          | .          | .          |
| P129 | .I.        | .          | .          | .          |
| KS06 | .I.        | .          | .          | .          |
| VR23 | .V.I.      | .          | .          | .          |
| SDSU | .I.        | .          | .          | .          |
| LV   | Q.I.       | S.YNA.     | A.         | I.V.S      |
|      | 180        |            |            |            |
| KS62 | FMPETMRWA  | TVLACFLAIL | LAI * 179  |            |
| NVSL | .          | .F.        | .          | 179        |
| P129 | .          | .LF.       | .          | 179        |
| KS06 | .          | .LF.       | .          | 179        |
| VR23 | .          | .LF.       | .          | 179        |
| SDSU | .          | .LF.       | .          | 179        |
| LV   | .L.SA.     | .TI.LF.    | .          | 184        |

E. 5a protein

|      |            |            |            |
|------|------------|------------|------------|
|      | 20         | 40         |            |
| KS62 | MFKYVGEMLD | RGLLLAIAFF | VVYRAVLFCC |
| NVSL | .          | .          | .I.        |
| VR23 | .          | .          | .R.        |
| SDSU | .          | .          | .H.        |
| P129 | .          | .          | .          |
| KS06 | .          | .          | .S.        |
| LV   | .SQI.AF.   | SA.LV.     | A.L.VL.    |

b. (17)

F. GP5

|      |            |            |             |             |
|------|------------|------------|-------------|-------------|
|      | 20         | 40         | 60          | 80          |
| KS62 | M-----LGRC | LTAGCCSRLL | SLWCI-VPFC  | FAVLVNASSN  |
| NVSL | .          | .          | .           | .A.N.       |
| P129 | .K.        | .          | .GS.N.S     | .F.         |
| VR23 | .EK.       | .Y.Q.      | .           | .ND.        |
| SDSU | .K.        | .          | .T.D.NG.    | .           |
| KS06 | .VK.       | .          | .F.L.G.A    | .NG.        |
| LV   | .RCSHK.F   | .PHS.FWW   | .F.L.TGLSWS | .DNGND      |
|      | 100        | 120        | 140         | 160         |
| KS62 | HIVSYGALTT | SHFLDTVGLV | TVSTAGFYHG  | RYVLSSIIYAV |
| NVSL | .          | .          | .           | .           |
| P129 | .          | .          | .           | .           |
| VR23 | .          | .A.        | .V.         | .           |
| SDSU | .          | .IA.       | .L.         | .           |
| KS06 | .          | .F.        | .F.         | .FA.G       |
| LV   | .L.L.F.    | .F.AL.G    | .A.VG.      | .C.V.GA     |
|      | 180        | 200        |             |             |
| KS62 | WRSPVIEKG  | GKVEVEGHLI | DLKRVVLDGS  | VATPLTRVSA  |
| NVSL | .          | .          | .           | .           |
| P129 | .          | .          | .           | .           |
| VR23 | .R         | .          | .           | .P          |
| SDSU | .R         | .          | .           | .P          |
| KS06 | .          | .          | .A.         | .           |
| LV   | .K.IVV.L   | .A.D.N.V   | .TI.H.E.V   | .K.Q.T.     |

G. M protein

|      |            |            |            |             |
|------|------------|------------|------------|-------------|
|      | 20         | 40         | 60         | 80          |
| KS62 | MGSLLDDFCY | DSTAPQKVLL | AFSITYTPVM | IYALKVSRGR  |
| NVSL | .          | .          | .          | .LLGLLHLLIF |
| VR23 | .H         | .          | .          | .A.         |
| SDSU | .H         | .A.        | .          | .A.         |
| P129 | .H         | .          | .          | .A.         |
| KS06 | .N         | .          | .          | .A.         |
| LV   | .G.N       | .PIA.LV    | .          | .I.         |
|      | 100        | 120        | 140        | 160         |
| KS62 | LLWGVYSAIE | TWKFITSRCR | LCLLGRKYIL | APAHHVESAA  |
| NVSL | .          | .          | .          | .           |
| VR23 | .          | .          | .          | .           |
| SDSU | .          | .          | .          | .           |
| P129 | .          | .          | .          | .           |
| KS06 | .          | .          | .R.        | .           |
| LV   | .FT        | S.         | .C.R.      | .L.S.S.SG.  |

|      |            |            |
|------|------------|------------|
| KS62 | AVKQGVNVLV | KYAK * 175 |
| NVSL | .          | 175        |
| VR23 | .          | 175        |
| SDSU | .          | 175        |
| P129 | .          | 175        |
| KS06 | .          | 175        |
| LV   | .R.        | .GR. 174   |

**Supplementary Figure 1. Peptide sequence alignment of PRRSV isolates incorporated in this study.** The alignment of (A) GP2, (B) E protein, (C) GP3, (D) GP4, (E) GP5, (F) 5a protein, and M protein (F) are shown for the seven viruses listed in Table 1. Peptide sequences were aligned using CLC Main Workbench version 6.6.2 (CLC bio). Previously characterized neutralizing epitopes are over-lined and identified by lower case letters with the corresponding reference(s) in parenthesis. Epitopes are shown for both Type 1 and Type 2 genotype viruses.
